# Supplementary material
Source: PubMed Central journal article supplement (PMC6821586)
Supplement: NIHMS1537771-supplement-1.pdf [file NIHMS1537771-supplement-1.pdf]

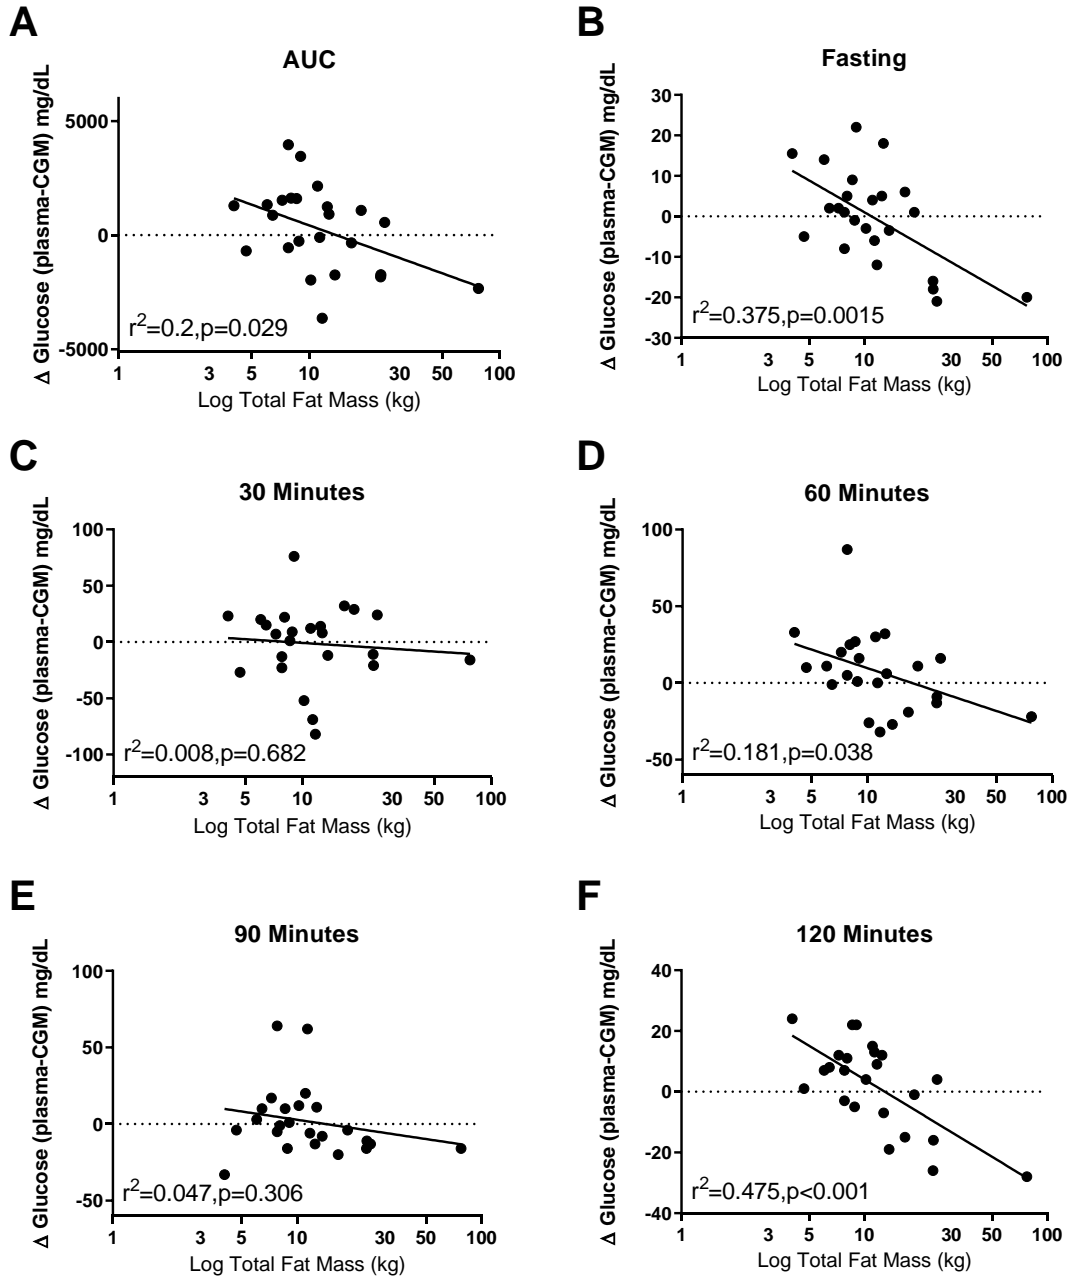

**Supplemental Figure 1a.** Linear regressions between total fat mass\* and difference between CGM glucose and plasma glucose during an oral glucose tolerance test. (A) Area under the curve (AUC); (B) fasting glucose; (C) time 30 minutes; (D) time 60 minutes; (E) time 90 minutes; (F) time 120 minutes of the glucose tolerance test.

\*numbers are transformed to maintain normalcy

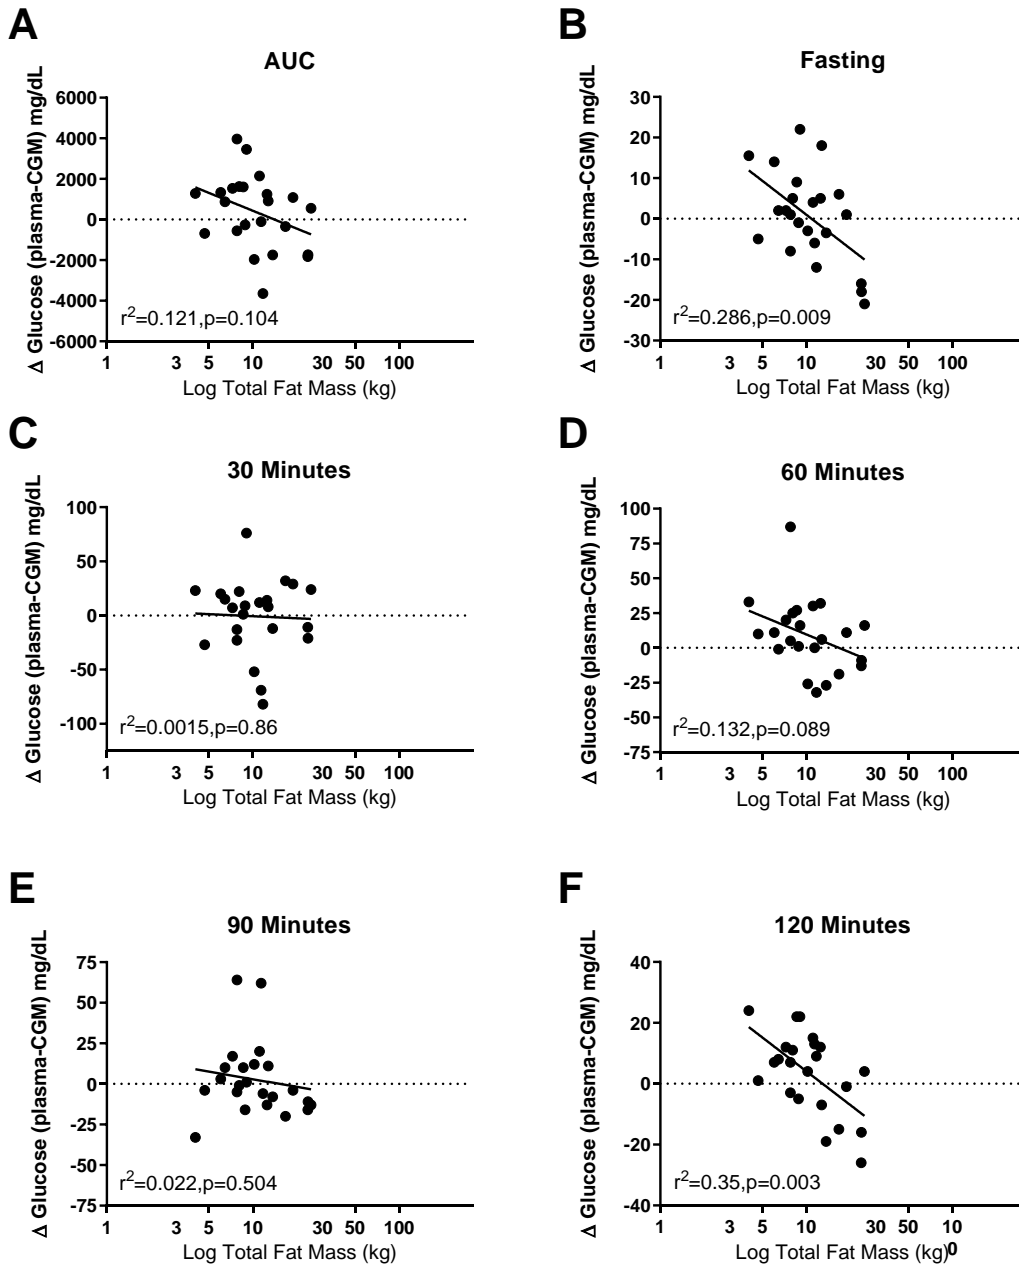

**Supplemental Figure 1b.** Linear regressions between Fat mass (kg)\* and difference between CGM glucose and plasma glucose during an oral glucose tolerance test with n=1 extreme outlier removed. (A) Area under the curve (AUC); (B) fasting glucose; (C) time 30 minutes; (D) time 60 minutes; (E) time 90 minutes; (F) time 120 minutes of the glucose tolerance test.

\*numbers are transformed to maintain normalcy

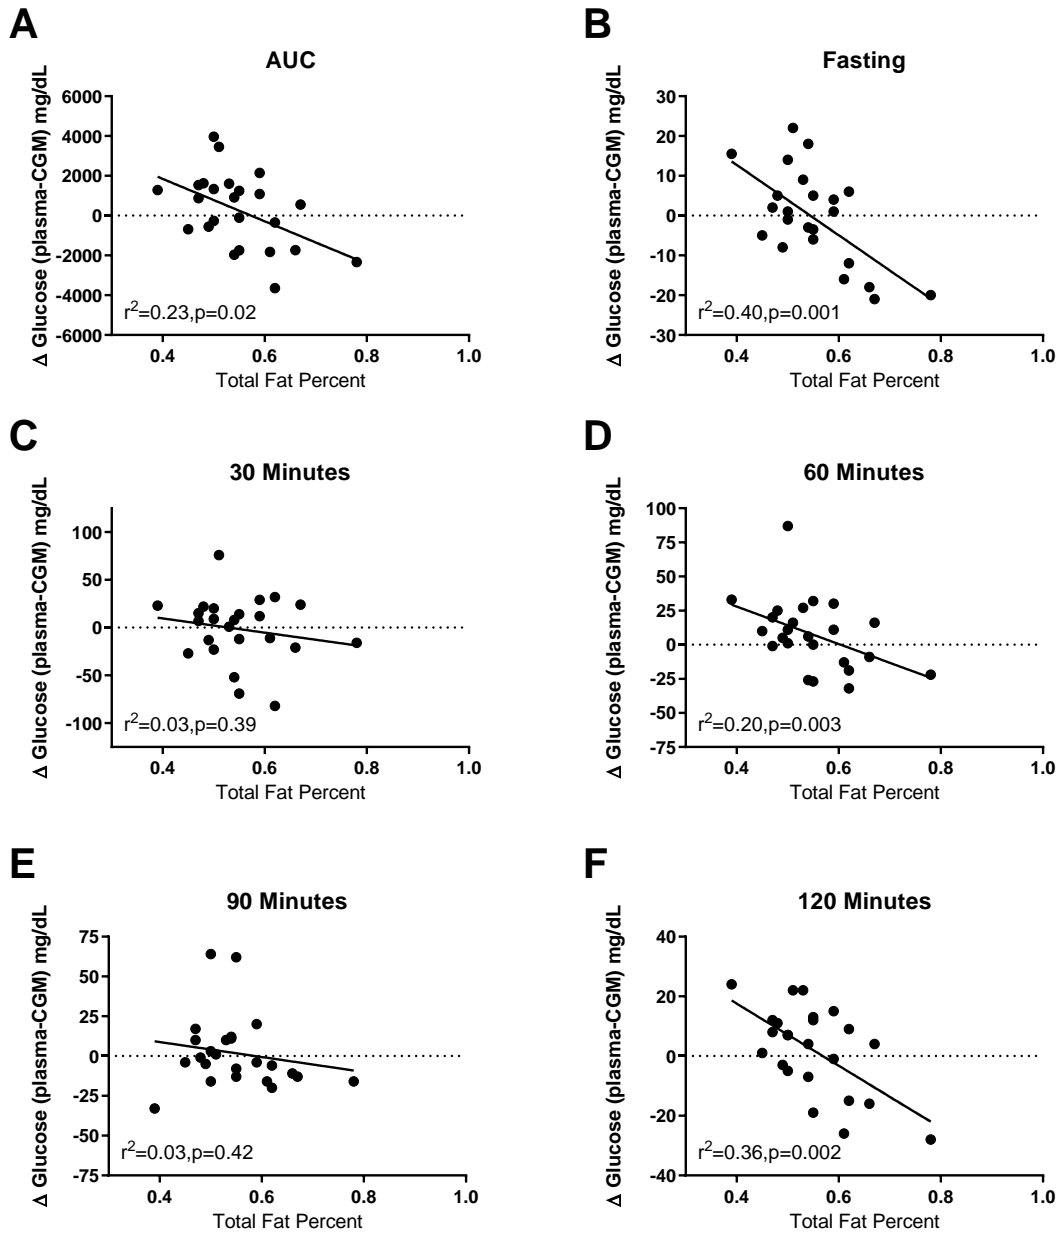

**Supplemental Figure 2a.** Linear regressions between total fat percentage\* and difference between CGM glucose and plasma glucose during an oral glucose tolerance test. (A) Area under the curve (AUC); (B) fasting glucose; (C) time 30 minutes; (D) time 60 minutes; (E) time 90 minutes; (F) time 120 minutes of the glucose tolerance test.

\*all percentages are transformed to maintain normalcy

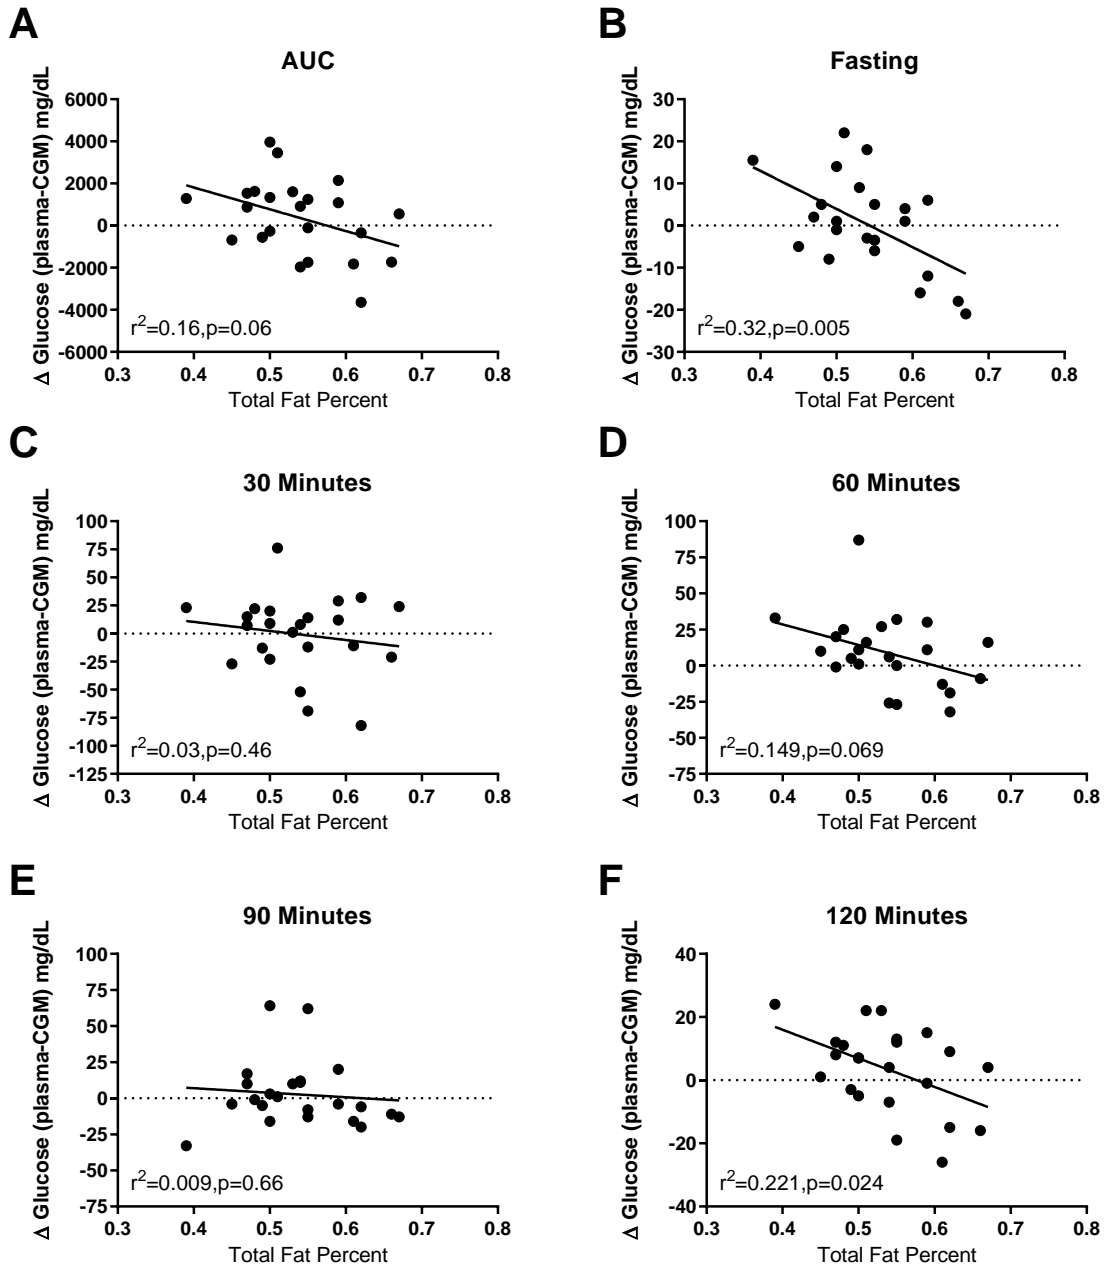

**Supplemental Figure 2b.** Linear regressions between total fat percentage\* and difference between CGM glucose and plasma glucose during an oral glucose tolerance test with n=1 extreme outlier removed. (A) Area under the curve (AUC); (B) fasting glucose; (C) time 30 minutes; (D) time 60 minutes; (E) time 90 minutes; (F) time 120 minutes of the glucose tolerance test.

\*all percentages are transformed to maintain normalcy

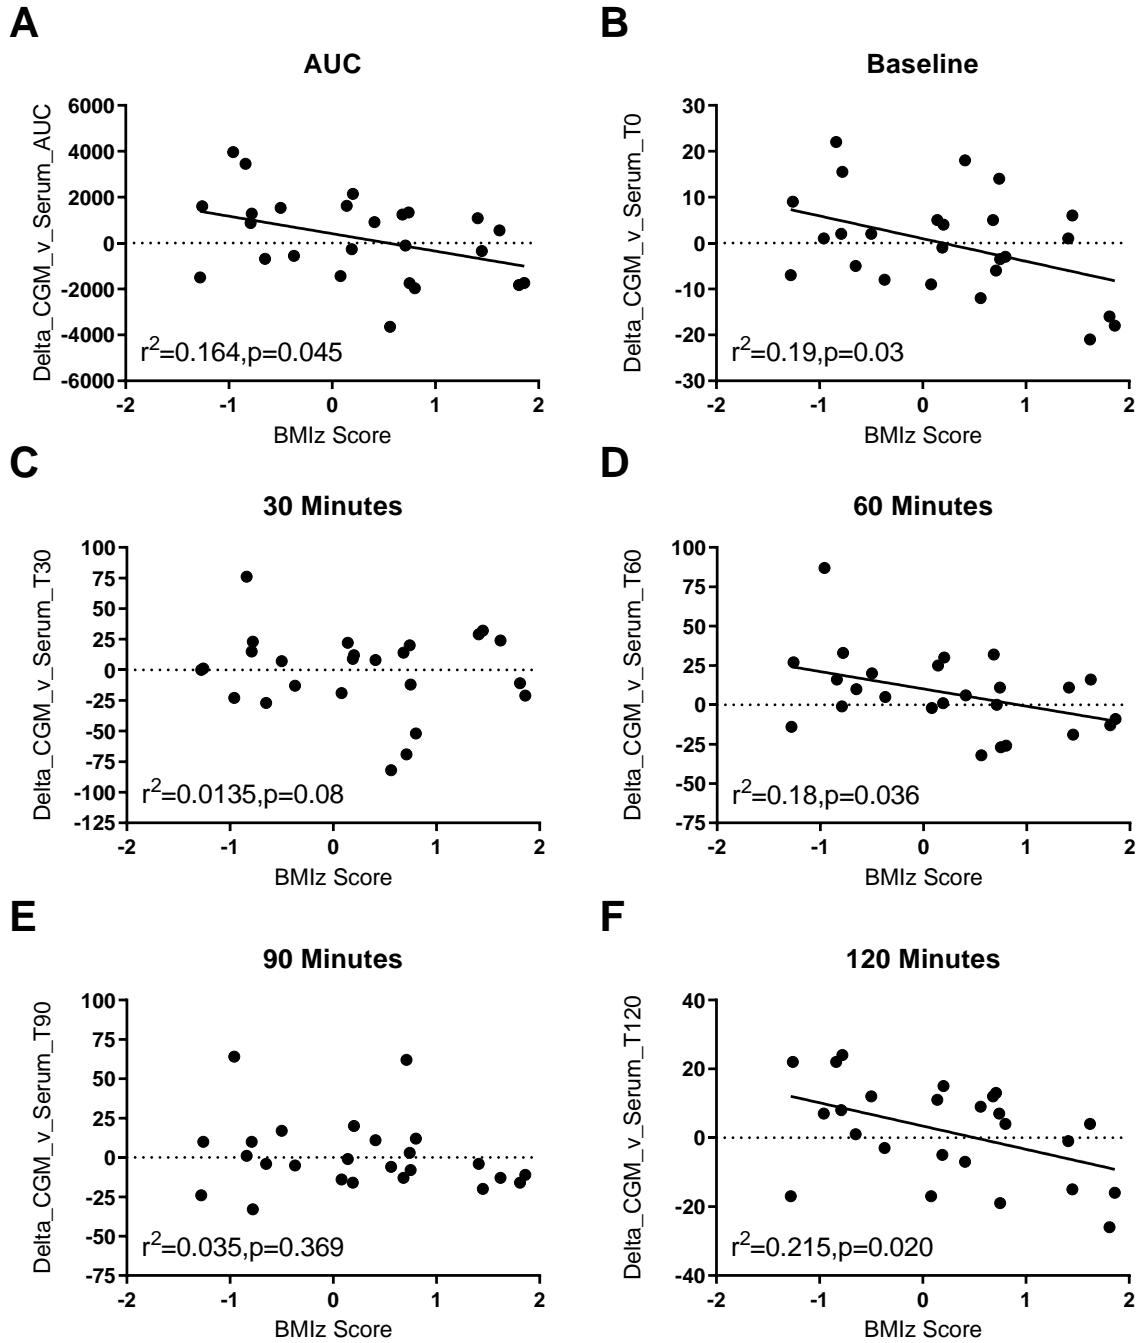

**Supplemental Figure 3.** Linear regressions between BMIz and difference between CGM glucose and plasma glucose during an oral glucose tolerance test with n=1 extreme outlier removed. (A) Area under the curve (AUC); (B) fasting glucose; (C) time 30 minutes; (D) time 60 minutes; (E) time 90 minutes; (F) time 120 minutes of the glucose tolerance test.
